# Supplementary material for: A microwell plate-based multiplex immunoassay for simultaneous quantitation of antibodies to infectious viruses
Source: Royal Society of Chemistry journal article supplement (doi:10.1039/c4an02262a), 2015-01-01
Supplement: c4an02262a1.pdf [file c4an02262a1.pdf]

## Electronic Supplementary Information

# A microwell plate-based multiplex immunoassay for simultaneous quantitation of antibodies to infectious viruses

Min-Suk Jeong and Dae-Ro Ahn\*

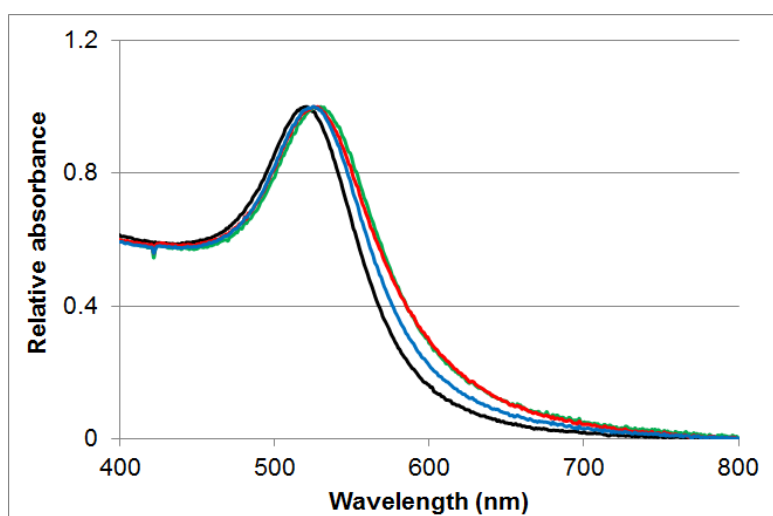

**Figure S1.** Absorbance of GNP (black trace), Ag<sub>HIV</sub>-GNP-DNA1 (green trace), Ag<sub>HCV</sub>-GNP-DNA2 (red trace) and Ag<sub>HBV</sub>-GNP-DNA3 (blue trace) complexes.

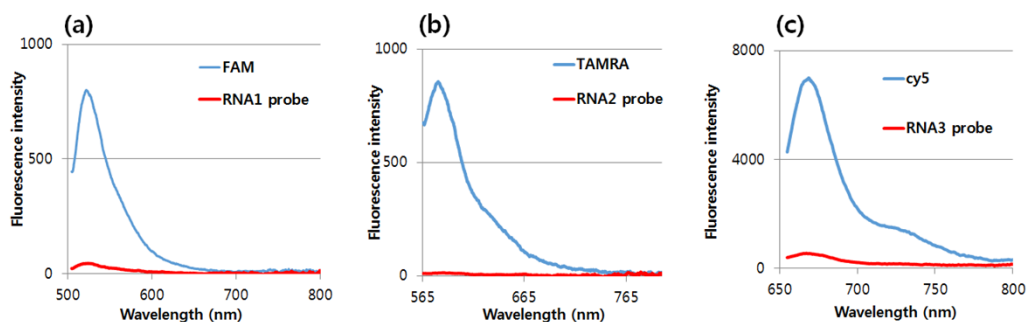

**Figure S2.** Emission spectra of fluorogenic (a) RNA1, (b) RNA2, and (c) RNA3 probes, and their relevant fluorophores obtained by excitation at the wavelength providing the same absorbance. The relative quantum yield (QY) of the probes was determined based on the known QY of the fluorophores and summarized in Table S1.

**Table S1.** Relative QY values of the fluorogenic RNA probes.

|        | RNA Probes |        |      | Fluorophores     |                    |                  |
|--------|------------|--------|------|------------------|--------------------|------------------|
|        | RNA1       | RNA2   | RNA3 | FAM <sup>a</sup> | TAMRA <sup>b</sup> | Cy5 <sup>c</sup> |
| QY (%) | 0.064      | 0.0081 | 0.03 | 0.93             | 0.28               | 0.3              |

a. *www.probes.com*; b. *J. Biomed. Opt.*, **2009**, *14*, 054005; c. *Nature Methods*, **2008**, *5*, 763.

**Table S2.** Relative QY values of the fluorogenic RNA probes. The excitation wavelength used were 466 nm for RNA1, 534 nm for RNA2, and 635 nm for RNA3, respectively.

| Probe | FWHM (nm) |
|-------|-----------|
| RNA1  | 44.8      |
| RNA2  | 49.4      |
| RNA3  | 47.8      |
